# Supplementary material for: Salmonella enterica Serovar Typhimurium 14028s Genomic Regions Required for Colonization of Lettuce Leaves
Source: Front Microbiol. 2020 Jan 24;11:6. doi: 10.3389/fmicb.2020.00006 (PMC6993584; doi:10.3389/fmicb.2020.00006)
Supplement: TABLE S3 — Genes deleted in each MGD mutant strain and their corresponding annotation based on the published genomes of the STm strains 14028s and LT2. [file Table_3.XLSX]

## Sheet: Table S3
Table S3. Genes deleted in each MGD mutant strain and their corresponding annotation based on the published genomes of the STm strains 14028s and LT2.
Mutation	Deleted Locus	Gene	Annotation (STm 14028s)	Annotation (STm LT2)
1	STM14_RS22490	fdhF	formate dehydrogenase H subunit alpha
	STM14_RS22500	lpxO		aspartyl beta-hydroxylase
	STM14_RS22505	phnO	aminoalkylphosphonic acid N-acetyltransferase
	STM14_RS22510	phnB/yjdN	VOC family metalloprotein
	STM14_RS22515	phnA	phnA family protein
	STM14_RS22520	proP	proline/betaine transporter
	STM14_RS22530	basS/pmrB	two-component system sensor histidine kinase
	STM14_RS22535	basR/pmrA	two-component system response regulator
	STM14_RS22540	yjdB/eptA	phosphoethanolamine transferase
	STM14_RS22545	yjdE	arginine:agmatine antiporter
	STM14_RS22550	adiY		AraC family transcriptional regulator
	STM14_RS22560	adi	arginine decarboxylase
	STM14_RS22565	melR	transcriptional regulator
	STM14_RS22570	melA	alpha-glucosidase/alpha-galactosidase
	STM14_RS22575	melB	melibiose carrier protein
	STM14_RS22580	fumB	class I fumarate hydratase
	STM14_RS22585	dcuB	anaerobic C4-dicarboxylate transporter
	STM14_RS22590		hypothetical protein
	STM14_RS22595	dcuR		regulates anaerobic fumarate respiration
	STM14_RS22600	dcuS	two-component system sensor histidine kinase
	STM14_RS22605		dimethyl sulfoxide reductase subunit A
	STM14_RS22610		dimethyl sulfoxide reductase subunit B
	STM14_RS22615		dimethyl sulfoxide reductase subunit C
	STM14_RS22620		molecular chaperone	putative component of anaerobic dehydrogenases
	STM14_RS22625		DUF1996 domain-containing protein
	STM14_RS22630		membrane protein
2	STM14_RS18330	fkpA	FKBP-type peptidyl-prolyl cis-trans isomerase
	STM14_RS18335	slyX	lysis protein
	STM14_RS18340	slyD	peptidylprolyl isomerase
	STM14_RS18345		YheV family putative metal-binding protein
	STM14_RS18350	kefB	glutathione-regulated potassium-efflux system protein
	STM14_RS18355	yheR/kefG	glutathione-regulated potassium-efflux system ancillary protein
	STM14_RS18360	yheS	ABC transporter ATP-binding protein
	STM14_RS18365		hypothetical protein
	STM14_RS18370		monooxygenase
3	STM14_RS15195	srlA	PTS sorbitol transporter subunit IIC
	STM14_RS15200	srlE	PTS sorbitol transporter subunit IIB
	STM14_RS15205	slrB	PTS glucitol/sorbitol transporter subunit IIA
	STM14_RS15210	srlD	sorbitol-6-phosphate dehydrogenase
	STM14_RS15215	gutM	transcriptional regulator
	STM14_RS15220	srlR		glucitol operon transcriptional repressor: DeoR family
	STM14_RS15225	gutQ	arabinose 5-phosphate isomerase
	STM14_RS15230	ygaA	NorR family transcriptional regulator
	STM14_RS15235		anaerobic nitric oxide reductase flavorubredoxin
	STM14_RS15240	ygbD/norW	NADH:flavorubredoxin reductase
	STM14_RS15245	hypF	carbamoyltransferase
	STM14_RS15250	hydN	electron transport protein
	STM14_RS15255		hypothetical protein
	STM14_RS15260	hycI	hydrogenase maturation peptidase
	STM14_RS15265	hycH	formate hydrogenlyase maturation protein
	STM14_RS15270	hycG/nuoB	NADH-quinone oxidoreductase subunit
	STM14_RS15275	hycF		formate hydrogenlyase complex iron-sulfur subunit
	STM14_RS15280	hycE	formate hydrogenlyase subunit 5
	STM14_RS15285	hycD	formate hydrogenlyase subunit 4
	STM14_RS15290	hycC	formate hydrogenlyase subunit 3
	STM14_RS15295	hycB		formate hydrogenlyase subunit 2
	STM14_RS15300	hycA	formate hydrogenlyase regulator
	STM14_RS15305	hypA		hydrogenase maturation nickel metallochaperone
	STM14_RS15310	hypB	hydrogenase nickel incorporation protein
	STM14_RS15315	hypC		hydrogenase assembly chaperone
	STM14_RS15320	hypD	hydrogenase formation protein
	STM14_RS15325	hypE	hydrogenase expression/formation protein
	STM14_RS15330	fhlA	formate hydrogenlyase transcriptional activator
	STM14_RS15335	ygbA	nitrous oxide-stimulated promoter family protein
	STM14_RS15340	sitA		iron ABC transporter substrate-binding protein
	STM14_RS15345	sitB	manganese/iron ABC transporter ATP-binding protein
	STM14_RS15350	sitC		iron ABC transporter permease
	STM14_RS15355	sitD		iron ABC transporter permease
	STM14_RS15360	avrA/yopJ	effector protein YopJ: pseudo (frameshifted)	putative inner membrane protein
	STM14_RS15365	sprB	transcriptional regulator
	STM14_RS15370	hilC		AraC family transcriptional regulator
	STM14_RS15375		transcriptional regulator
	STM14_RS15380	orgC	type III secretion system effector protein
	STM14_RS15385	orgB	oxygen-regulated invasion protein
	STM14_RS15390	orgA	oxygen-regulated invasion protein
	STM14_RS15395	prgK	type III secretion system inner membrane ring lipoprotein
	STM14_RS15400	prgJ	type III secretion system inner rod protein
	STM14_RS15405	prgI	type III secretion system needle complex protein
	STM14_RS15410	prgH	type III secretion system inner membrane ring protein
	STM14_RS15415	hilD	transcriptional regulator
	STM14_RS15420	hilA	transcriptional regulator
	STM14_RS15425	iagB	SPI-1 type III secretion system invasion protein
4	STM14_RS12670	yfaX	IclR family transcriptional regulator
	STM14_RS12675	yfaY	nicotinamide mononucleotide deamidase-related protein
	STM14_RS12680	yfaZ		putative inner membrane protein
	STM14_RS12685	yfaO	nucleoside triphosphatase
	STM14_RS12690	ais	histidine phosphatase family protein
5	STM14_RS10460		penicillin-binding protein 2
	STM14_RS10465		glycoside hydrolase family 105 protein
	STM14_RS10470	flhE	flagellar biosynthesis protein
	STM14_RS10475	flhA	flagellar biosynthesis protein
	STM14_RS10480	flhB	flagellar biosynthetic protein
	STM14_RS10485	cheZ	protein phosphatase
	STM14_RS10490	cheY	two-component system response regulator: chemotaxis regulator
	STM14_RS10495	cheB	chemotaxis response regulator protein-glutamate methylesterase
	STM14_RS10500	cheR		chemotaxis protein-glutamate O-methyltransferase
	STM14_RS10505	cheM	methyl-accepting chemotaxis protein II
	STM14_RS10510	cheW	chemotaxis protein
	STM14_RS10515	cheA		sensory histitine protein kinase
	STM14_RS10520	motB		flagellar motor protein: linking torque machinery to cell wall
	STM14_RS10525	motA	flagellar motor stator protein
	STM14_RS10530	flhC	flagellar transcriptional regulator
	STM14_RS10535	flhD	flagellar transcriptional regulator
	STM14_RS10540		hypothetical protein
	STM14_RS10545	yecG/uspC	universal stress protein C
	STM14_RS10550	otsA	trehalose-6-phosphate synthase
	STM14_RS10555	otsB	trehalose-phosphate phosphatase
	STM14_RS10560		hypothetical protein
	STM14_RS10565	araH	DJ-1 family protein
	STM14_RS10570	ftnB	non-heme ferritin-like protein
	STM14_RS10575		hypothetical protein
	STM14_RS10580		hypothetical protein
	STM14_RS10585	ftn	cytoplasmic iron storage protein
	STM14_RS10590	yecH	DUF2492 family protein
	STM14_RS10595	tyrP	tyrosine transporter
	STM14_RS10600	yecA	YecA family protein
	STM14_RS10605		glucose-6-phosphate dehydrogenase
	STM14_RS10610		cell wall-associated hydrolase
	STM14_RS10615		membrane protein
6	STM14_RS10090		hypothetical protein
	STM14_RS10095	yobG/mgrB	PhoP/PhoQ regulator MgrB
	STM14_RS10100		hypothetical protein
	STM14_RS10105	kdgR	DNA-binding transcriptional regulator
	STM14_RS10110		MFS transporter
	STM14_RS10115	htpX		zinc metalloprotease
	STM14_RS10120	prc	tail-specific protease
	STM14_RS10125	proQ	RNA chaperone ProQ
	STM14_RS10130	yebR	GAF domain-containing protein
	STM14_RS10135	yebS	paraquat-inducible protein A
	STM14_RS10140		PqiB family protein
	STM14_RS10145	yebU/rsmF	methyltransferase
	STM14_RS10150		DUF1480 family protein
	STM14_RS10155	yebW	DUF1482 family protein
	STM14_RS10160	prpA	serine/threonine-protein phosphatase 1
	STM14_RS10165		membrane protein
	STM14_RS10170	sopE2	SPI-1 type III secretion system guanine nucleotide exchange factor
	STM14_RS10175		DUF1398 domain-containing protein
	STM14_RS10180		hypothetical protein
	STM14_RS10185		GNAT family N-acetyltransferase
	STM14_RS24885		hypothetical protein
	STM14_RS26035			putative cytoplasmic protein
	STM14_RS10195		hypothetical protein
	STM14_RS10200		transposase: pseudo (frameshifted; internal stop)
	STM14_RS10205		integrase
	STM14_RS24890		hypothetical protein
	STM14_RS24895		hypothetical protein
	STM14_RS10210	pagO		EamA family transporter
	STM14_RS10215			putative inner membrane protein
	STM14_RS10220		disulfide bond formation protein B
	STM14_RS26040		putative cytoplasmic protein
	STM14_RS24905		hypothetical protein
	STM14_RS24910		hypothetical protein
	STM14_RS24915		hypothetical protein
	STM14_RS10225	pagK	PhoPQ-activated virulence protein
	STM14_RS10230	mig-3		phage tail assembly protein
	STM14_RS10235		DUF1441 family protein
	STM14_RS10240		hypothetical protein
	STM14_RS10245		lytic enzyme
	STM14_RS10250		DUF2514 domain-containing protein
	STM14_RS10255		glycoside hydrolase family 19 protein
	STM14_RS10260	recE
	STM14_RS26045			putative phage integrase protein
	STM14_RS10270			putative cytoplasmic protein
	STM14_RS10275		DUF2511 domain-containing protein
	STM14_RS10280		copper resistance D family protein
	STM14_RS10285	yobA	CopC domain-containing protein
7	STM14_RS08285	ynfM	MFS transporter
	STM14_RS08290	ynfL	LysR family transcriptional regulator
	STM14_RS24785		hypothetical protein
	STM14_RS08295	mlc	ROK family transcriptional regulator
	STM14_RS08300	ynfK	dethiobiotin synthase
	STM14_RS08305	clcB	voltage-gated ClC-type chloride channel
	STM14_RS08310	osmV	osmoprotectant ABC transporter ATP-binding protein
	STM14_RS08315	osmW	osmoprotectant import permease
	STM14_RS08320	osmX	osmoprotectant ABC transporter substrate-binding protein
	STM14_RS08325	osmY	osmoprotectant import permease
	STM14_RS08330	ynfI/dmsD	Tat proofreading chaperone
	STM14_RS08335		dimethyl sulfoxide reductase subunit H
8	STM14_RS08105	pdxY	pyridoxamine kinase
	STM14_RS08110	gstA	glutathione transferase
	STM14_RS08115	ydgR	dipeptide and tripeptide permease A
	STM14_RS08120	nth	endonuclease III
	STM14_RS08125	ygdQ/rsxE	electron transporter
	STM14_RS08130	ygdP/rsxG	electron transport complex subunit
	STM14_RS08135	ydgO/rsxD	electron transport complex subunit
	STM14_RS08140	rsxC	electron transport complex subunit
	STM14_RS08145	ydgM/rsxB	electron transport complex subunit
	STM14_RS08150	rsxA	electron transport complex subunit
	STM14_RS08155	ydgK	DUF2569 domain-containing protein
	STM14_RS08160	ydgT		oriC-binding nucleoid-associated protein
	STM14_RS08165		division septum protein Blr
	STM14_RS08170	ydgJ	oxidoreductase
	STM14_RS08175	add	adenosine deaminase
9	STM14_RS07705	sufB	Fe-S cluster assembly protein
	STM14_RS07710	sufC	Fe-S cluster assembly ATPase
	STM14_RS07715	sufD	Fe-S cluster assembly protein
	STM14_RS07720	sufS	cysteine desulfurase
	STM14_RS07725	ynhA/sufE	cysteine desulfuration protein
	STM14_RS07730	ynhG		murein L,D-transpeptidase
	STM14_RS07735	lppB	hypothetical protein
	STM14_RS07740	lpp		murein lipoprotein
	STM14_RS07745	pykF	pyruvate kinase I
	STM14_RS24765		hypothetical protein
	STM14_RS07750	orf48	APC family permease
	STM14_RS07755	orf32	alpha/beta fold hydrolase
	STM14_RS07760	orf245	hypothetical protein
	STM14_RS07765	orf408	DeoR family transcriptional regulator
	STM14_RS07770	ttrA	tetrathionate reductase subunit A
	STM14_RS07775	ttrC	tetrathionate reductase subunit C
	STM14_RS07780	ttrB	tetrathionate reductase subunit B
	STM14_RS07785	ttrS	two-component system sensor histidine kinase
	STM14_RS07790	ttrR	two-component system response regulator
	STM14_RS07795	orf70	hypothetical protein
	STM14_RS07800	orf319	DUF523 and DUF1722 domain-containing protein
	STM14_RS07805	orf242	MerR family transcriptional regulator
	STM14_RS07810	ssrB	two component system response regulator
	STM14_RS07815	ssrA	hybrid sensor histidine kinase/response regulator
	STM14_RS07820	ssaB/spiC		pathogenicity island chaperone protein
	STM14_RS07825	ssaC/spiA		EscC/YscC/HrcC family type III secretion system outer membrane ring protein
	STM14_RS07830	ssaD	EscD/YscD/HrpQ family type III secretion system inner membrane ring protein
	STM14_RS07835	ssaE		EscE/YscE/SsaE family type III secretion system needle protein co-chaperone
	STM14_RS07840	sseA	SPI-2 type III secretion system chaperone
	STM14_RS07845	sseB		pathogenicity island 2 effector protein
	STM14_RS07850	sscA	CesD/SycD/LcrH family type III secretion system chaperone
	STM14_RS07855	sseC		pathogenicity island 2 effector protein
	STM14_RS07860	sseD		pathogenicity island 2 effector protein
	STM14_RS07865	sseE	pathogenicity island 2 effector protein
	STM14_RS07870	sscB	CesD/SycD/LcrH family type III secretion system chaperone
	STM14_RS07875	sseF		pathogenicity island 2 effector protein
	STM14_RS07880	sseG	pathogenicity island 2 effector protein
	STM14_RS07885	ssaG	type III secretion system needle protein
	STM14_RS07890	ssaH	type III secretion system needle protein co-chaperone
	STM14_RS07895	ssaI	type III secretion system inner rod protein
	STM14_RS07900	ssaJ		type III secretion inner membrane ring protein
	STM14_RS07905		hypothetical protein
	STM14_RS07910	ssaK		secretion system apparatus protein
	STM14_RS07915	ssaL		secretion system apparatus protein
	STM14_RS07920	ssaM		secretion system apparatus protein
	STM14_RS07925	ssaV		type III secretion system export apparatus protein
	STM14_RS07930	ssaN	type III secretion system ATPase
	STM14_RS07935	ssaO		secretion system apparatus protein
	STM14_RS07940	ssaP		secretion system apparatus protein
	STM14_RS07945	ssaQ		secretion system apparatus protein
	STM14_RS07950	ssaR		type III secretion system export apparatus protein
	STM14_RS07955	ssaS		type III secretion system export apparatus protein
	STM14_RS07960	ssaT		type III secretion system export apparatus protein
	STM14_RS07965	ssaU		type III secretion system export apparatus switch protein
10	STM14_RS05455		Lrp/AsnC family transcriptional regulator
	STM14_RS05460		hypothetical protein
	STM14_RS05465		PLP-dependent lyase/thiolase
	STM14_RS05470		sodium:alanine symporter family protein
	STM14_RS05475	pncB	nicotinate phosphoribosyltransferase
	STM14_RS05480			Gifsy-2 prophage integrase
